# Supplementary material for: Optineurin-facilitated axonal mitochondria delivery promotes neuroprotection and axon regeneration
Source: PubMed Central journal article supplement — bioRxiv. 2024 Apr 3:2024.04.02.587832. Preprint. [Version 1] doi: 10.1101/2024.04.02.587832 (PMC11014509; doi:10.1101/2024.04.02.587832), 2024-04-03
Supplement: media-1.pdf [file media-1.pdf]

## Supplementary Materials for

### **Optineurin-facilitated axonal mitochondria delivery promotes neuroprotection and axon regeneration**

**Dong Liu<sup>1,†</sup>, Hannah C. Webber<sup>1,†</sup>, Fuyun Bian<sup>1,†</sup>, Yangfan Xu<sup>1,†,‡</sup>, Manjari Prakash<sup>2,†</sup>, Xue Feng<sup>1</sup>, Ming Yang<sup>1</sup>, Hang Yang<sup>1</sup>, In-Jee You<sup>1</sup>, Liang Li<sup>1</sup>, Liping Liu<sup>1</sup>, Pingting Liu<sup>1</sup>, Haoliang Huang<sup>1</sup>, Chien-Yi Chang<sup>3</sup>, Liang Liu<sup>1</sup>, Sahil H Shah<sup>1</sup>, Anna La Torre<sup>4</sup>, Derek S. Welsbie<sup>5</sup>, Yang Sun<sup>1</sup>, Xin Duan<sup>6</sup>, Jeffrey Louis Goldberg<sup>1</sup>, Marcus Braun<sup>2</sup>, Zdenek Lansky<sup>2,\*</sup>, and Yang Hu<sup>1,\*</sup>**

Corresponding authors: Y.H. (huyang@stanford.edu) and Z.L. (zdenek.lansky@ibt.cas.cz).

#### **The PDF file includes:**

Figs. S1 to S7

#### **Other Supplementary Materials for this manuscript include the following:**

Movies S1 to S7

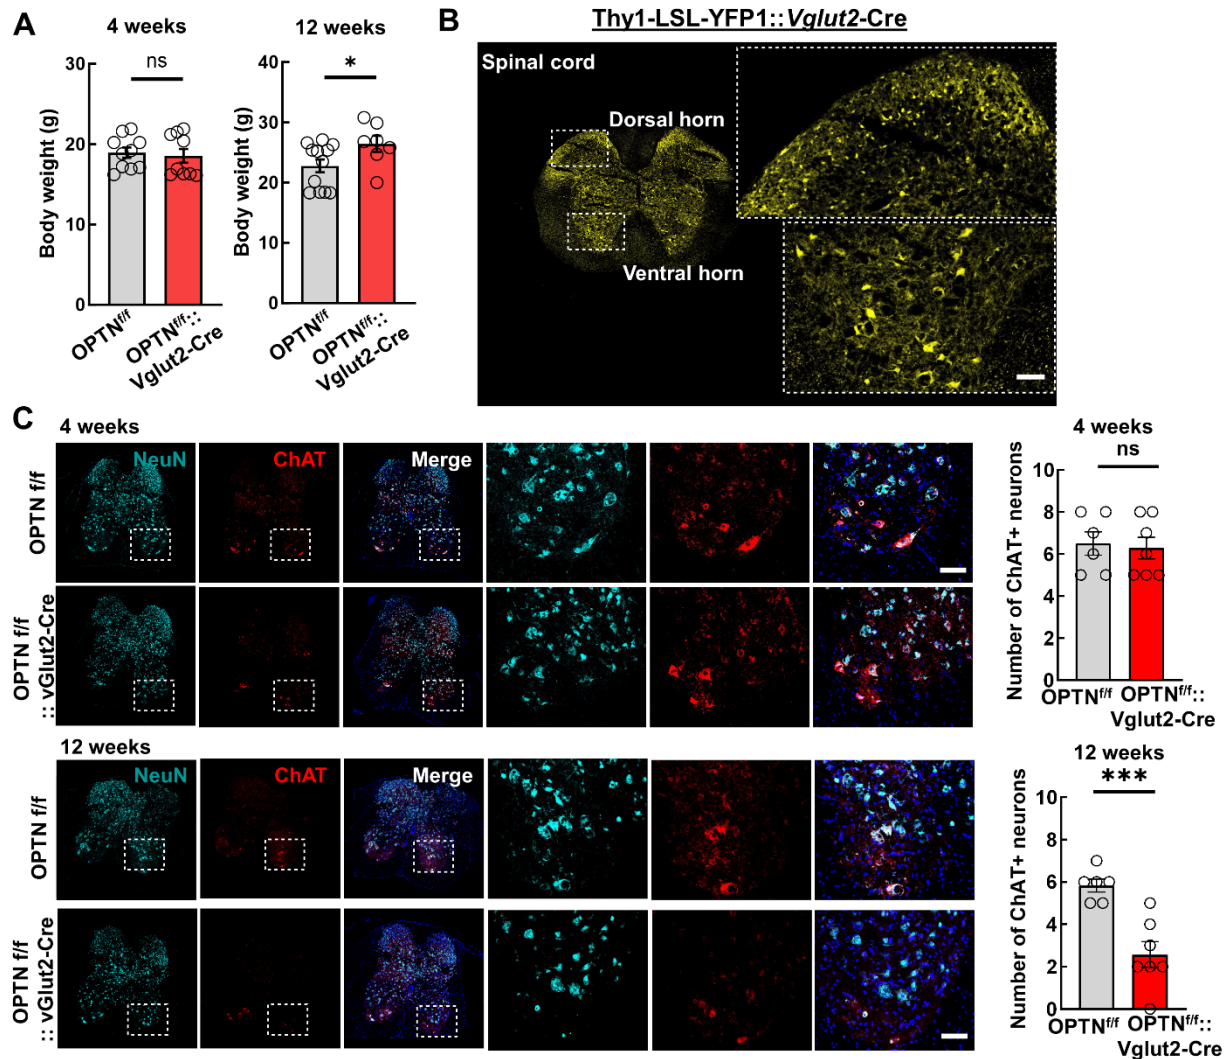

**Fig. S1. Vglut2-Cre mediated OPTN $\Delta$ C in neurons causes body weight change and motor neuron degeneration in  $OPTN^{f/f}; Vglut2-Cre$  mice, related to Figure 2. A, Body weight measurements at 4w and 12w. n = 9-12 mice. B, Representative confocal images of spinal cord sections in the  $Thy1-LSL-YFP-1::Vglut2-Cre$  mice. Higher magnification images of spinal cord dorsal and ventral horns are shown to the right. Scale bar, 50  $\mu m$ . C, Representative confocal images of lumbar spinal cord sections coimmunostained with NeuN and ChAT for motor neuron and DAPI for cell nuclei of 4 weeks and 12 weeks old  $OPTN^{f/f}; Vglut2-Cre$  mice. Enlarged images of framed regions in the ventral horns are shown to the right. Scale bar, 50  $\mu m$ . Quantification of**

ChAT-positive motor neuron survival at 4 or 12 weeks old are shown in the right panel.  $n = 6-7$  mice. All the quantification data are presented as means  $\pm$  s.e.m, \*:  $p < 0.05$ , \*\*\*:  $p < 0.001$ , ns: no significance, unpaired Student's t-test.

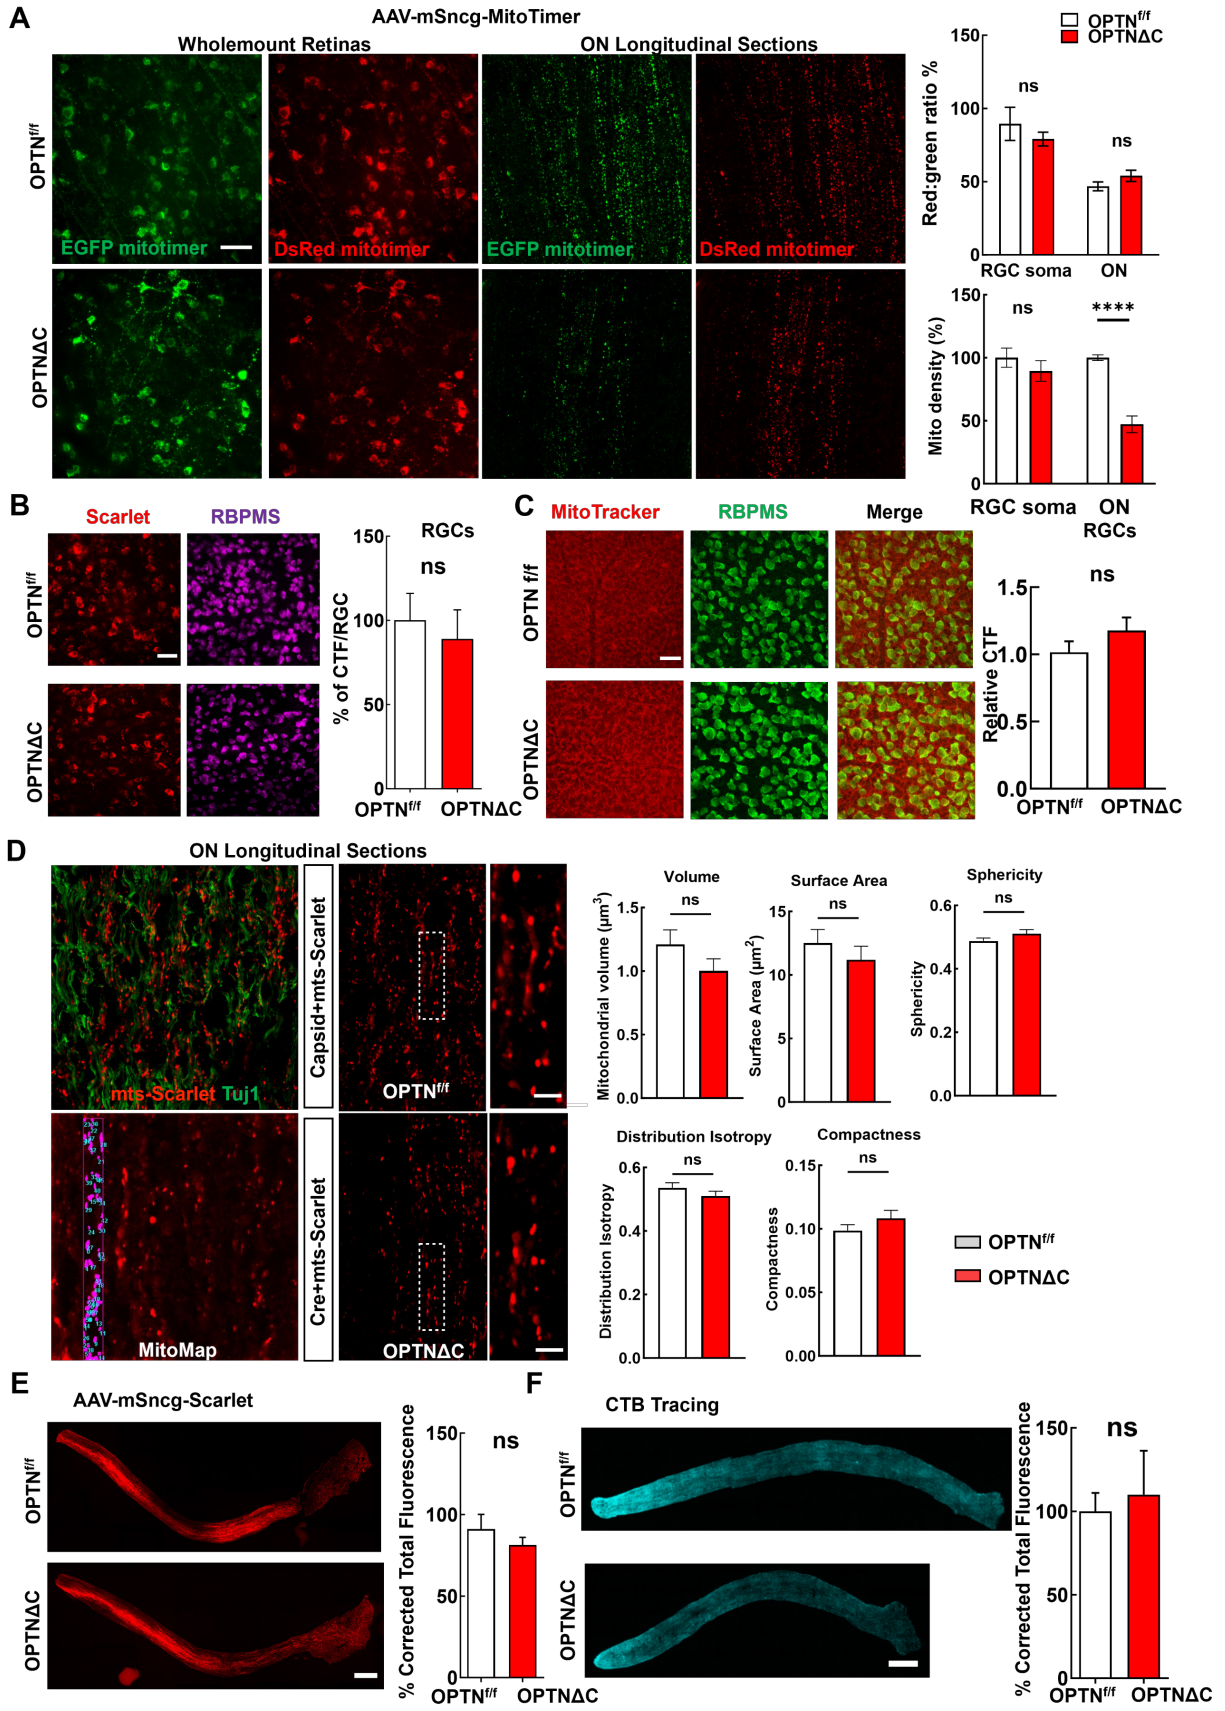



**Fig. S2. OPTN $\Delta$ C significantly decreases ON mitochondrial density but does not significantly affect mitophagy, RGC mitochondrial density, mitochondrial morphology, or general axonal transportation, related to Figure 3.** **A**, Representative images of retina wholemounts and ON longitudinal sections 2 weeks after intravitreal injection of AAV-Cre + AAV-MitoTimer in OPTN<sup>f/f</sup> mice, Scale bar, 50  $\mu$ m. Quantification of red to green fluorescence intensity ratio and mitochondrial density of RGC somata in retinas and axons in ONs.  $n = 5$  mice. **B**, Representative images of retina wholemount 2 weeks after intravitreal injection of AAV-Cre + AAV-4xMTS-Scarlet in OPTN<sup>f/f</sup> mice. Scale bar, 50  $\mu$ m. Quantification of Corrected Total Fluorescence (CTF)/RGC, represented as a percentage of OPTN $\Delta$ C eyes compared to the contralateral naïve OPTN<sup>f/f</sup> (CL) eyes.  $n = 5$  mice. **C**, Representative images of MitoTracker labeled-retinal wholemounts. Scale bar, 50  $\mu$ m. Quantification of CTF, represented as a ratio of OPTN $\Delta$ C eyes compared to the CL eyes.  $n = 5$  mice. **D**, Representative images of ON longitudinal sections 2 weeks after intravitreal injection of AAV-Cre + AAV-4xMTS-Scarlet in OPTN<sup>f/f</sup> mice. Axons are immunostained with Tuj1 antibody. Higher magnification images are shown to the right. Scale bar, 10  $\mu$ m. MitoMap analysis of mitochondrial volume, surface area, sphericity, distribution isotropy and compactness does not show significant difference between OPTN<sup>f/f</sup> and OPTN $\Delta$ C ONs.  $n = 3$  mice. **E**, Representative images of ON longitudinal sections 2 weeks after intravitreal injection of AAV-Cre + AAV-Scarlet. Scale bar, 200  $\mu$ m. Quantification of total Scarlet fluorescence, represented as a percentage of OPTN $\Delta$ C eyes compared to the CL eyes.  $n = 4$  mice. **F**, Representative images of ON longitudinal sections 2 weeks after intravitreal injection of AAV-Cre and 3 days post-injection with Cholera Toxin subunit B (CTB) Alexa Fluor-555 conjugate. Scale bar, 200  $\mu$ m. Quantification of total CTB fluorescence, represented as a percentage of

OPTN $\Delta$ C eyes compared to the CL eyes.  $n = 3$  mice. All the quantification data are presented as means  $\pm$  s.e.m, ns, no significance, \*\*\*\*:  $p < 0.0001$ , Student's t-test.

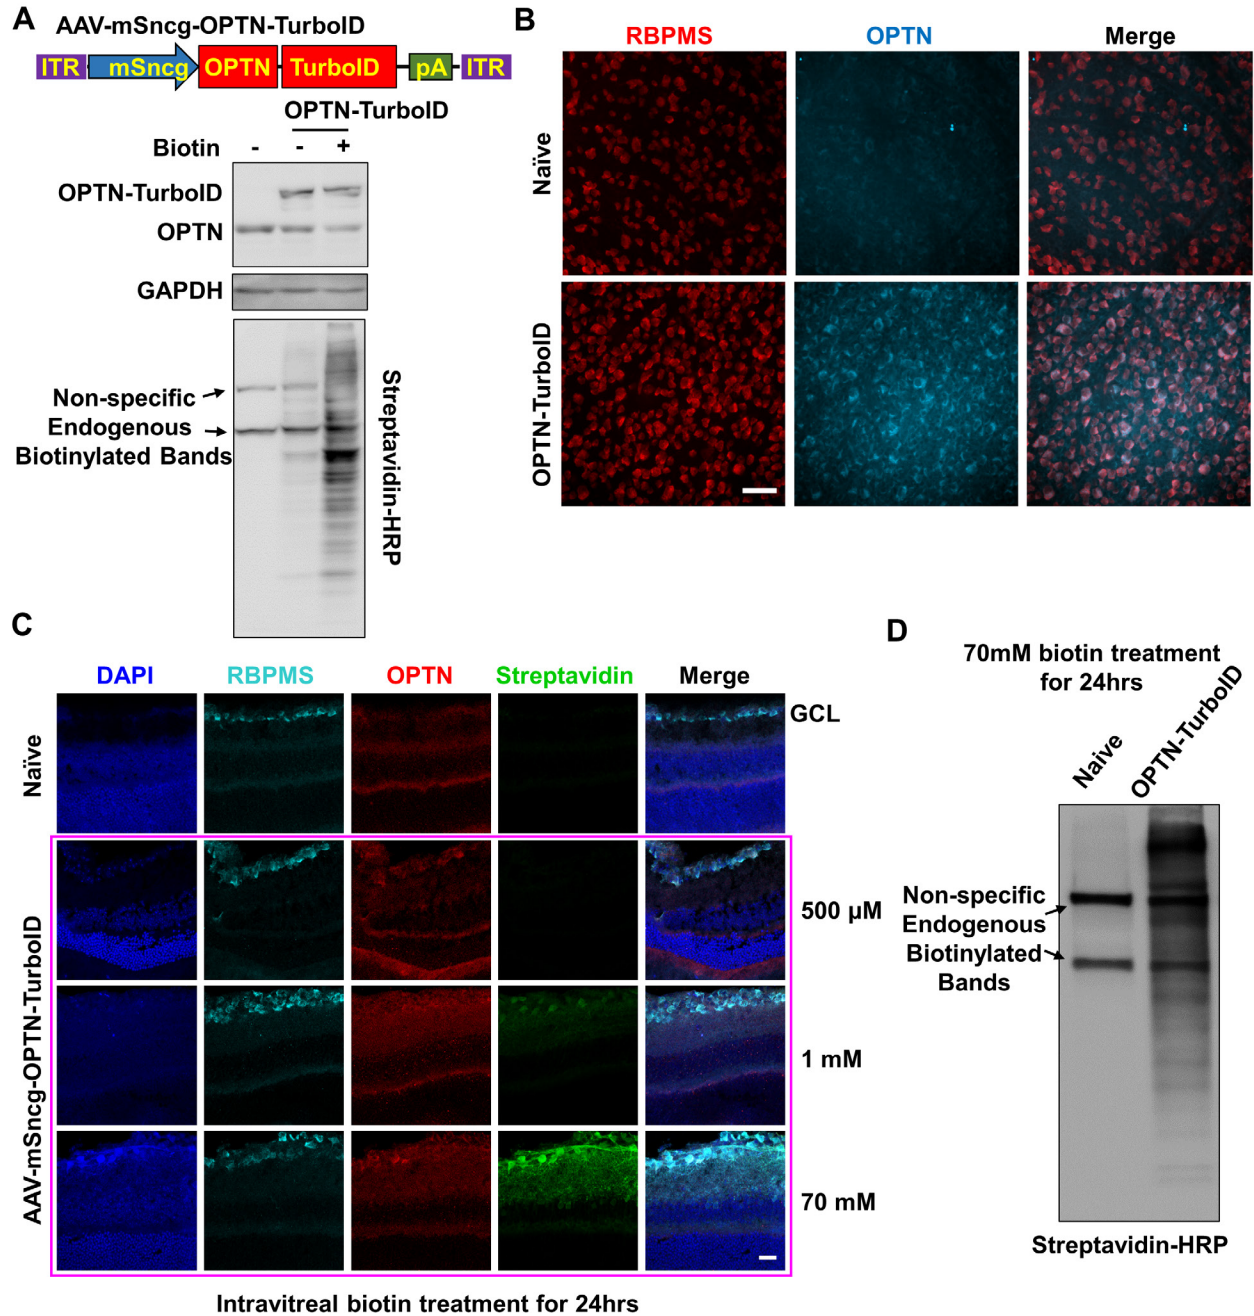

**Fig. S3. *In vivo* RGC TurboID assay development, related to Figure 3E.** A, (top) AAV vector to drive human OPTN-TurboID expression in RGCs. (bottom) Naïve and OPTN-TurboID expressing HEK293 cells were treated with or without 500 $\mu$ M biotin for 24hrs. OPTN-TurboID expression and OPTN-TurboID-mediated protein biotinylation in HEK293 cells identified by

Western blotting. **B**, Representative images of retina wholemounts demonstrating AAV-mediated OPTN-TurboID overexpression in RGCs. Scale bar, 50  $\mu\text{m}$ . **C**, Representative images of retina sections with OPTN-TurboID expression 24 hours after intravitreal delivery of various amounts of biotin. Scale bar, 20  $\mu\text{m}$ . **D**, Western blotting of retina lysates 24 hours after intravitreal delivery of 70mM biotin, demonstrating biotinylated proteins in RGCs with HRP-conjugated streptavidin.

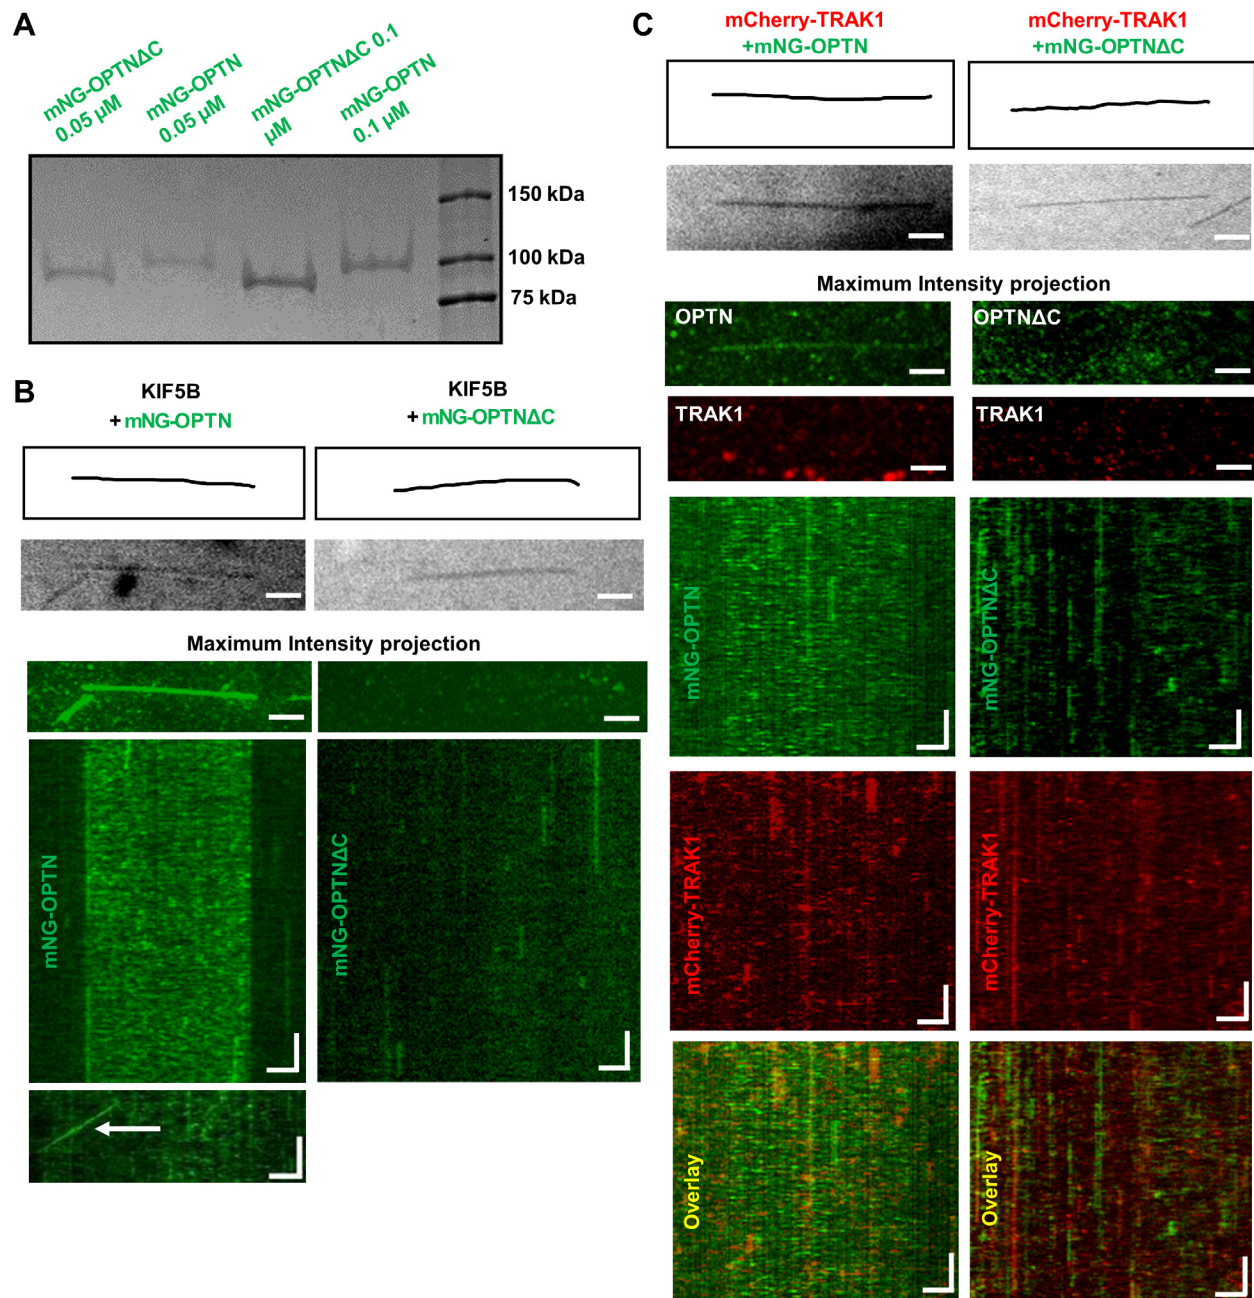

**Fig. S4. OPTN binds to microtubules in a C-terminus dependent manner, which is not affected by TRAK1 or KIF5B alone, related to Figure 4. A, SDS gel showing purified mNG-OPTN and mNG-OPTNΔC. B, (top to bottom) IRM image of microtubules, maximum intensity projection of mNG-OPTN/mNG-OPTNΔC, Kymographs of 0.1 μM mNG-OPTN or 0.1 μM mNG-OPTNΔC binding and unbinding to microtubules in the presence of 1 nM unlabeled KIF5B**

(representative rare migration event marked by arrow). Horizontal scale bar = 2  $\mu\text{m}$ , Vertical scale bar = 4 seconds.  $n = 3$  experiments. **C**, (top to bottom) RM image of microtubules, maximum intensity projection of mNG-OPTN/mNG-OPTN $\Delta\text{C}$  and TRAK1-mCherry, Kymograph of 10 nM OPTN / 30 nM OPTN $\Delta\text{C}$  binding and unbinding to microtubules in the presence of 17 nM TRAK1-mCherry. Horizontal scale bar = 2  $\mu\text{m}$ , Vertical scale bar = 8 seconds.  $n = 3$  experiments.



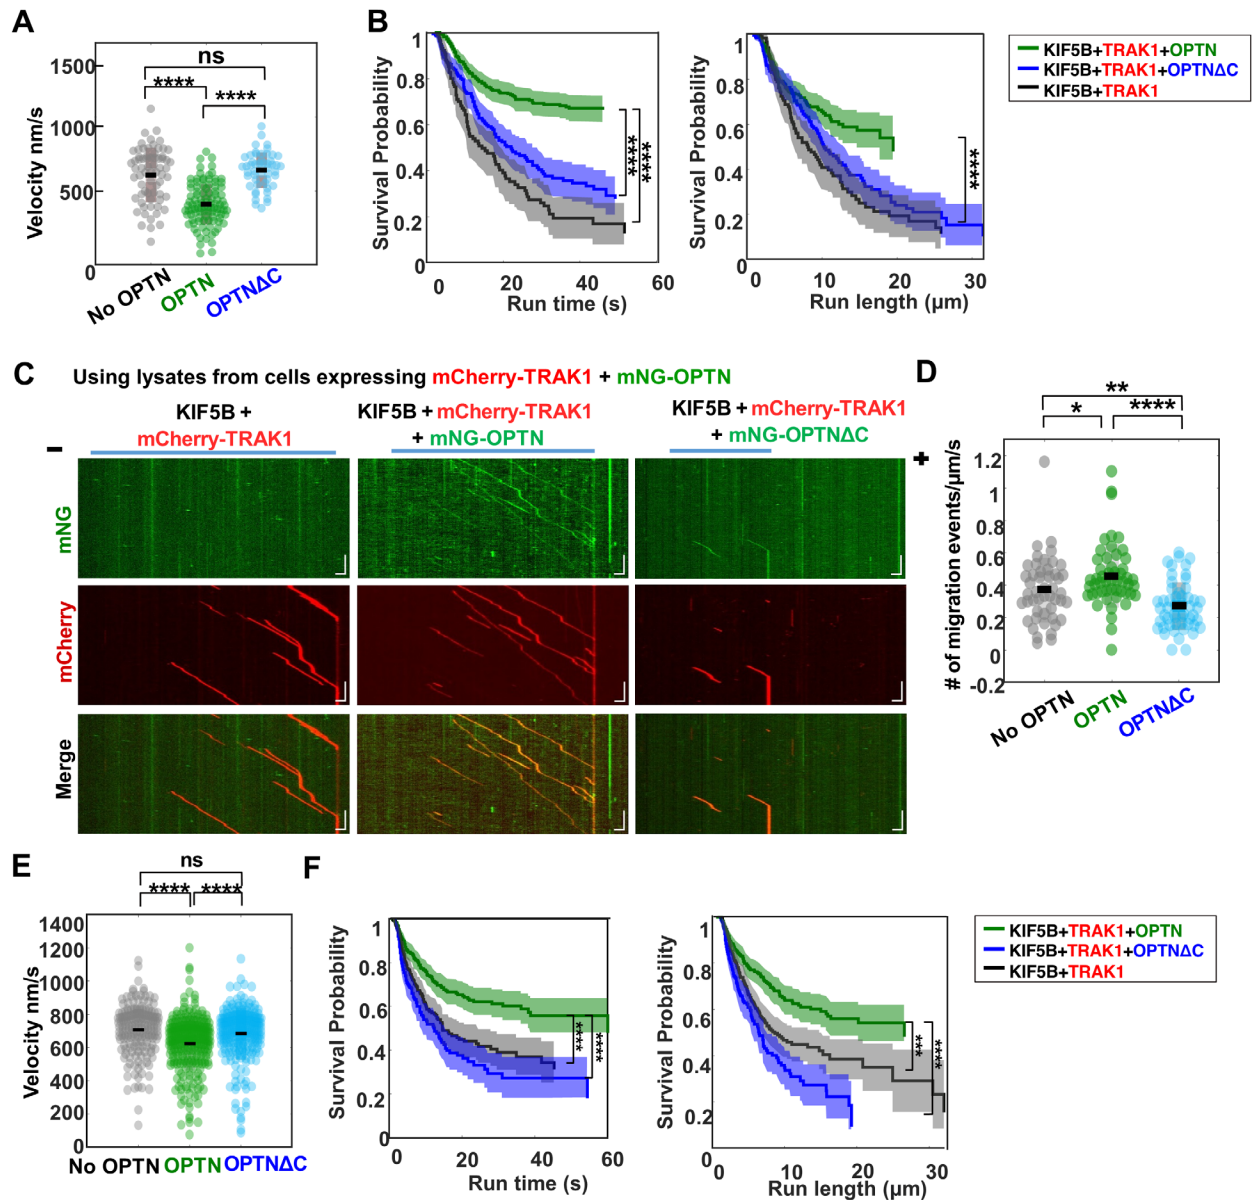

**Fig. S5. *In vitro* motility assay of immobilized microtubules with recombinant proteins or cell lysates expressing mNG-OPTN and TRAK1-mCherry and *ex vivo* ON mitochondria kymograph assays, related to Figure 4. **A**, Velocity of continuous migration events of complexes of KIF5B-TRAK1-OPTN ( $n = 101$ ), KIF5B-TRAK1-OPTN $\Delta$ C ( $n = 50$ ), and KIF5B-TRAK1 ( $n = 68$ ), respectively.  $n = 3$  experiments, \*\*\*\*:  $p < 10^{-13}$ , ns = 0.267, t-test. **B**, Left, Run time probability distribution of complexes of KIF5B-TRAK1-OPTN (green,  $n = 332$ ), KIF5B-TRAK1-**

OPTN $\Delta$ C (blue, n = 208), and KIF5B-TRAK1 (black, n = 118) on microtubules. Shaded regions indicate the 95% confidence intervals. Right, Run length probability distribution (Kaplan-Meier estimation) of complexes of KIF5B-TRAK1-OPTN (green, n = 332), KIF5B-TRAK1-OPTN $\Delta$ C (blue, n = 208) and KIF5B-TRAK1 (black, n = 118) on microtubules. Shaded regions indicate the 95% confidence intervals. n = 4-6 experiments, \*\*\*\*: p < 0.0001, t-test. **C**, *In vitro* motility assay of immobilized microtubules with cell lysate expressing TRAK1-mCherry and mNG-OPTN. Kymograph of TRAK1 with OPTN or OPTN $\Delta$ C in the presence of unlabeled KIF5B walking to the plus end of microtubules. Horizontal scale bar, 2  $\mu$ m; vertical scale bar, 10 seconds. Blue bars indicate the microtubule positions along the kymograph. **D**, Frequency of migration events (/  $\mu$ m/s) of complexes of KIF5B-TRAK1 (n = 48), KIF5B-TRAK1-OPTN (n = 52), KIF5B-TRAK1-OPTN $\Delta$ C (n = 52), N = 4 experiments. unpaired Student's t-test. **E**, Velocity of continuous migration events of complexes of KIF5B-TRAK1 (n = 236), KIF5B-TRAK1-OPTN (n = 274) and KIF5B-TRAK1-OPTN $\Delta$ C (n = 177), respectively. N = 4 experiments, unpaired Student's t-test. **F**, Left, Run time probability distribution of complexes of KIF5B-TRAK1-OPTN (green, n = 327, N=4), KIF5B-TRAK1-OPTN $\Delta$ C (blue, n = 248, N=4), and KIF5B-TRAK1 (black, n = 220, N=4) on microtubules. Shaded regions indicate the 95% confidence intervals. Right, Run length probability distribution (Kaplan-Meier estimation) of complexes of KIF5B-TRAK1-OPTN (green, n = 327, N=4), KIF5B-TRAK1-OPTN $\Delta$ C (blue, n = 248, N=4) and KIF5B-TRAK1 (black, n = 220, N=4) on microtubules. Shaded regions indicate the 95% confidence intervals. n=number of molecules, N= number of independent trails. **D-F**, \*: p < 0.05, \*\*: p < 0.01, \*\*\*: p < 0.001, \*\*\*\*: p < 0.0001, ns: no significance, with t-test.

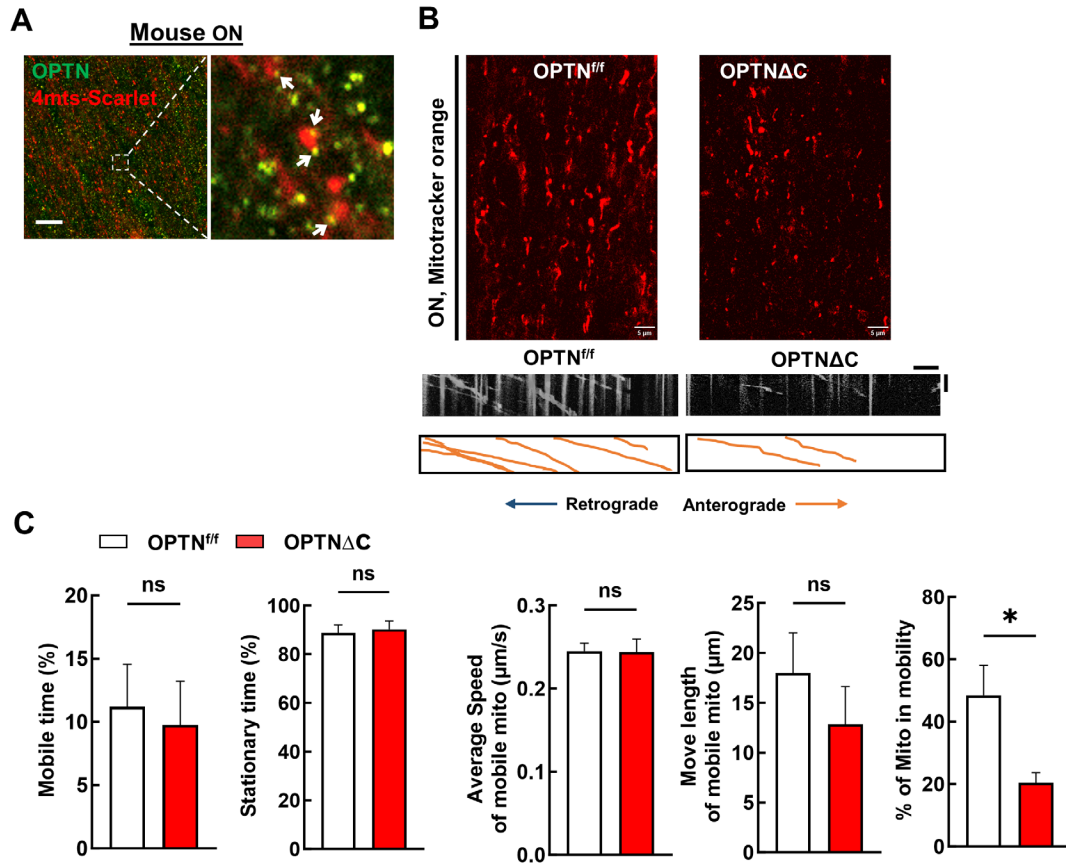

**Fig. S6. *Ex vivo* time-lapse imaging revealed mitochondrial trafficking deficits in OPTN $\Delta$ C-optic nerves.** **A**, Immunostaining of endogenous OPTN in mouse ONs with mitochondria labeled with 4MTS-Scarlet. White arrows indicate the OPTN punctas on the surfaces of mitochondria. Scale bar, 20  $\mu$ m. **B**, Upper, Representative ON wholemount images of the OPTN<sup>fl/fl</sup> and OPTN $\Delta$ C mice with MitoTracker Orange labeling, Scale bars, 20  $\mu$ m. Lower, Kymograph and traces of MitoTracker labeled mitochondria movement along the axons in the ONs of the OPTN<sup>fl/fl</sup> and OPTN $\Delta$ C mice. Horizontal scale bar, 5  $\mu$ m; vertical scale bar, 1 minute. **C**, Quantification of each mitochondrion time in motion and time in stationary, average speed and move length of each mobile mitochondrion, and percentage of mitochondria in motion. n = 21–30 mitochondria from

3 axons per group. Data are presented as means  $\pm$  s.e.m, \*:  $p < 0.05$ , ns, no significance, with Student's t-test.

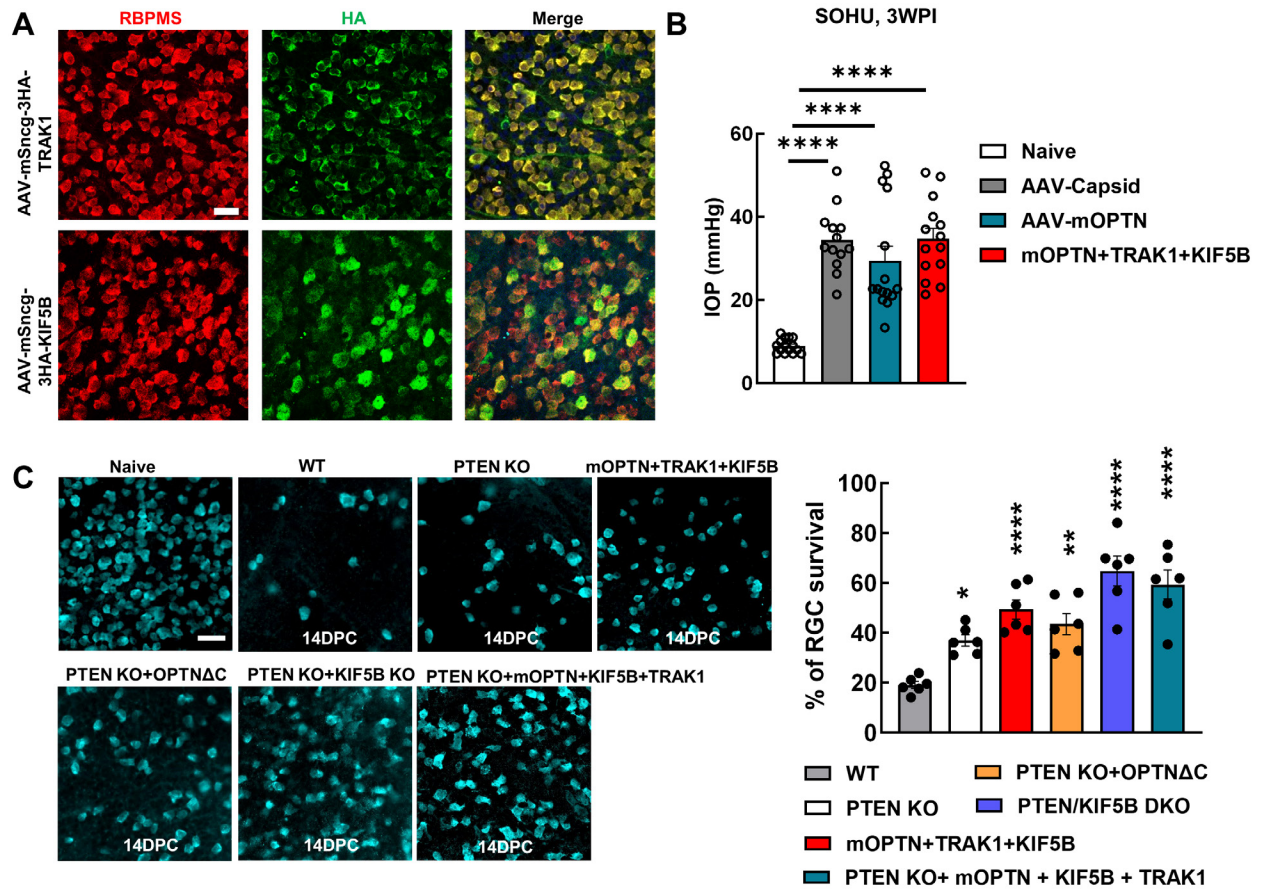

**Fig. S7. AAV-mediated KIF5B and/or TRAK1 overexpression in RGCs promote RGC survival, related to Figures 5-7.** **A**, Representative confocal images of retinal wholemounts showing AAV2-mSncg promoter-mediated TRAK1 and KIF5B expression in RBPMS-positive RGCs 2 weeks post AAV intravitreal injection. Scale bar, 20  $\mu$ m. **B**, IOP of Naïve and SOHU eyes from different groups of mice at 3wpi.  $n = 13-15$  mice. Data are presented as means  $\pm$  s.e.m, \*\*\*\*:  $p < 0.0001$ , with one-way ANOVA and *post hoc* Dunnett's comparison test. **C**, Left, representative confocal images of the retinal wholemounts showing surviving RBPMS-positive RGCs at 14dpc, Scale bar, 50  $\mu$ m. Right, quantification of surviving RGC somata in peripheral retina at 14dpc, represented as percentage of crushed eyes compared to the CL eyes. Data are presented as means  $\pm$  s.e.m,  $n = 6$  in each group. \*:  $p < 0.05$ , \*\*:  $p < 0.01$ , \*\*\*\*:  $p < 0.0001$ , one-way ANOVA with *post hoc* Dunnett's comparison test.

**Movie S1. OPTN binds to microtubules in a C-terminus dependent manner.** Time-lapse imaging of purified mNG-OPTN or mNG-OPTN $\Delta$ C binding and unbinding to immobilized microtubules. Scale bar, 2.1  $\mu$ m.

**Movie S2. Lysates of OPTN expressing cells bind to microtubules in a C-terminus dependent manner.** Time-lapse imaging of lysates from cells expressing mNG-OPTN or mNG-OPTN $\Delta$ C binding and unbinding to immobilized microtubules. Scale bar, 2  $\mu$ m.

**Movie S3. TRAK1-KIF5B migration on microtubules with or without OPTN or OPTN $\Delta$ C from purified proteins.** Time-lapse imaging of purified mCherry-TRAK1 walking to the plus ends of immobilized microtubules in the presence of unlabeled KIF5B with or without purified mNG-OPTN or mNG-OPTN $\Delta$ C. Scale bar, 2  $\mu$ m.

**Movie S4. TRAK1-KIF5B migration on microtubules with or without OPTN or OPTN $\Delta$ C from cell lysates.** Time-lapse imaging of lysates from cells expressing mCherry-TRAK1 with or without mNG-OPTN or mNG-OPTN $\Delta$ C walking to the plus ends of immobilized microtubules in the presence of unlabeled KIF5B. Scale bar, 2  $\mu$ m.

**Movie S5. Mitochondria migration in cultured hippocampal neuron axons in the presence of OPTN or OPTN $\Delta$ C.** Time-lapse imaging of mitochondria (labeled with MitoDsRed) showing anterograde movement to the right and retrograde movement to the left in OPTN<sup>f/f</sup> or OPTN $\Delta$ C hippocampal neurons. Axons are labelled with AAV-mSncg-EGFP (OPTN<sup>f/f</sup>) or AAV-mSncg-Cre-T2A-EGFP (OPTN $\Delta$ C). Scale bar, 10  $\mu$ m,



**Movie S6. Mitochondria migration in *ex vivo* ONs in the presence of OPTN or OPTN $\Delta$ C.**

Time-lapse imaging of mitochondria (labeled with MitoTracker Orange) movements along the axons in *ex vivo* ONs of the OPTN<sup>f/f</sup> and OPTN $\Delta$ C mice. Scale bar, 5  $\mu$ m.

**Movie S7. Mitochondria migration in *ex vivo* ONs of naïve, glaucomatous, and treated**

**glaucomatous mice.** Time-lapse imaging of mitochondria (labeled with MitoTracker Orange) movements along the axons in *ex vivo* ONs of the naïve, SOHU glaucoma 1wpi, and SOHU glaucoma mice treated with mOPTN+TRAK1+KIF5B. Scale bar, 20  $\mu$ m.
